# Supplementary material for: Hepatocyte-secreted extracellular vesicles modify blood metabolome and endothelial function by an arginase-dependent mechanism
Source: PubMed Central journal article supplement (PMC5314384; doi:10.1038/srep42798), 2017-02-17

Title:

Hepatocyte-secreted extracellular vesicles modify blood metabolome and endothelial function by an arginase-dependent mechanism

Authors:

Felix Royo<sup>1</sup>, Laura Moreno<sup>2</sup>, Justyna Mleczko<sup>1</sup>, Laura Palomo<sup>1</sup>, Esperanza Gonzalez<sup>1</sup>, Diana Cabrera<sup>3</sup>, Angel Cogolludo<sup>2</sup>, Francisco Perez Vizcaino<sup>2</sup>, Sebastiaan van-Liempd<sup>3</sup> and Juan M Falcon-Perez<sup>1,3,4</sup>

Affiliations:

<sup>1</sup>Exosomes Laboratory. CIC bioGUNE, CIBEREHD, Derio 48160 Bizkaia, Spain.

<sup>2</sup>Department of Pharmacology, School of Medicine, University Complutense of Madrid, 28040 Madrid, Spain. CIBERES. Instituto de Investigación Sanitaria Gregorio Marañón (IISGM)

<sup>3</sup>Metabolomics platform, CIC bioGUNE, CIBERehd, , Derio 48160 Bizkaia, Spain

<sup>4</sup>IKERBASKE Basque Foundation for science, Bilbao, 48013 Bizkaia, Spain

**Supplemental Figure Legends**

**Supplemental Figure 1.** Arginase and GOT activity in the serum of rats treated with vehicle (control) or indicated hepatotoxicants. **(A)** Arginase activity (U/L) was normalized to the activity detected in the control. The error bars represent S.E.M (n = 3) (*t*-test; *p*-values for APAP = 0.001 and GalN < 0.001). **(B)** Correlation between GOT transaminase and arginase activities in the serum of rats treated with vehicle (control) or indicated hepatotoxicants (n = 3). Correlation coefficients for linear regression are indicated.

**Supplemental Figure 2.** Endothelium-independent relaxation of pulmonary arteries (PA) is preserved following the treatment with EVs. Concentration-dependent relaxation induced by the endothelium-independent vasodilator, sodium nitroprusside (SNP), in control (n = 6) or EV-treated (50 µg/mL; n = 6) rat PA rings incubated in the absence **(A)** or presence **(B)** of NOR-NOHA (10 ng/mL; n = 6). Results are expressed as a percentage of the relaxation induced by SNP; they were analyzed using the repeated measures ANOVA.

Supplemental Figure 1

**A**

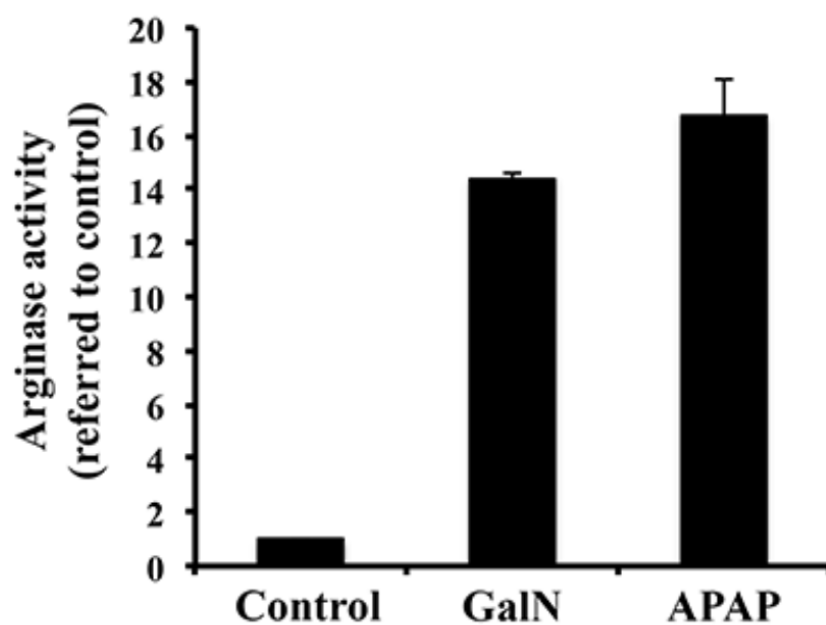

**B**

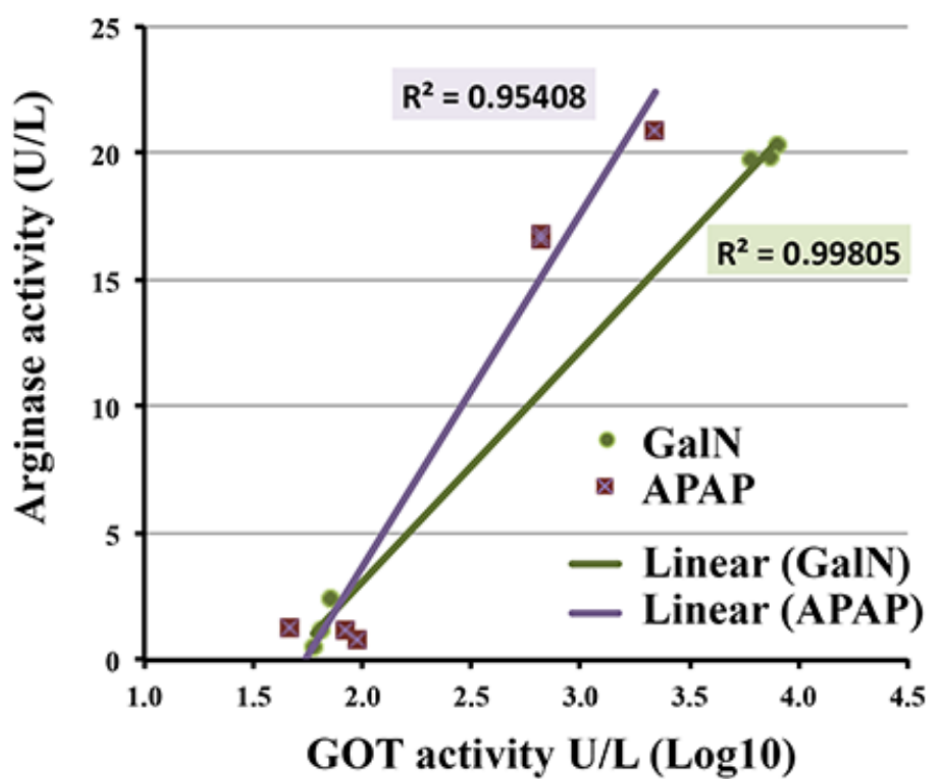

Supplemental Figure 2

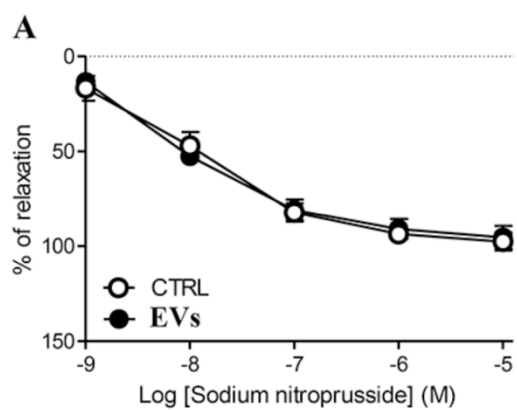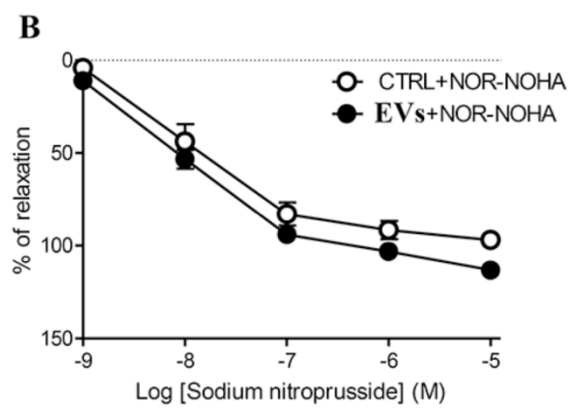

Supplement: srep42798-s1.pdf [file srep42798-s1.pdf]
